# Supplementary material for: CETP Expression in Bone-Marrow-Derived Cells Reduces the Inflammatory Features of Atherosclerosis in Hypercholesterolemic Mice
Source: MDPI journal article supplement (doi:10.3390/biom13101556), 2023-10-22
Supplement: s1 [file s1]

## Supplementary Material

**Table S1.** High fat and high cholesterol diet composition

| Product              | Grams %      | Kcal % |
|----------------------|--------------|--------|
| Protein              | 20           | 17     |
| Carbohydrate         | 50           | 43     |
| Fat                  | 21           | 41     |
|                      | (4.7 Kcal/g) | 100    |
| Ingredients          | Grams        | Kcal   |
| Casein, 80 Mesh      | 195          | 780    |
| DL-Methionine        | 3            | 12     |
| Corn Starch          | 50           | 200    |
| Maltodextrin 10      | 100          | 400    |
| Sucrose              | 341          | 1364   |
| Cellulose            | 50           | 0      |
| Milk Fat, Anhydrous* | 200          | 1800   |
| Corn Oil             | 100          | 90     |
| Mineral Mix S10001   | 35           | 0      |
| Calcium Carbonate    | 4            | 0      |
| Vitamin Mix V10001   | 10           | 40     |
| Choline Bitartrate   | 2            | 0      |
| Cholesterol, USP*    | 1            | 0      |
| Ethoxyquin           | 0.04         | 0      |
| Total                | 1001.54      | 4686   |

\*Anhydrous milk fat typically contains approximately 0.3% cholesterol.

**Table S2.** Primers' sequences used for RT-PCR:

| Gene             | Primers |                          |
|------------------|---------|--------------------------|
| 36B4*            | forward | GAGGAATCAGATGAGGATATGGGA |
|                  | reverse | AAGCAGGCTGACTTGGTTGC     |
| ARG1             | forward | GGCGCATTACAGTCACTTA      |
|                  | reverse | TGAACCCAACTCTTGGGAAG     |
| CCR2             | forward | GCCATCATAAAGGAGCCATACC   |
|                  | reverse | ATGCCGTGGATGAACTGAGG     |
| CD36             | forward | GGAAGTGTGGGCTCATTGC      |
|                  | reverse | CATGAGAATGCCTCCAAACAC    |
| CDC42            | forward | ACGTGTCCCCACCTGGTGCT     |
|                  | reverse | GCGAGACAGCGTCCACCCAC     |
| CETP<br>(simian) | forward | CAAATCAGCCACTTGTCCAT     |
|                  | reverse | CAGTTGTGTGTTGATCTGGA     |
| ICAM1            | forward | GTGATGCTCAGGTATCCATCCA   |

|                                |         |                         |
|--------------------------------|---------|-------------------------|
|                                | reverse | CACAGTTCTCAAAGCACAGCG   |
| <b>IL-10</b>                   | forward | GCTCTTACTGACTGGCATGAG   |
|                                | reverse | CGCAGCTCTAGGAGCATGTG    |
| <b>IL-1<math>\beta</math></b>  | forward | CCTTCCAGGATGAGGACATGA   |
|                                | reverse | TGAGTCACAGAGGATGGGCTC   |
| <b>IL-4</b>                    | forward | CCAAACGTCCTCACAGCAAC    |
|                                | reverse | AAGCCCGAAAGAGTCTCTGC    |
| <b>IL-6</b>                    | forward | CACGGCCTTCCCTACTTCAC    |
|                                | reverse | GGTCTGTTGGGAGTGGTATC    |
| <b>iNOS</b>                    | forward | GTTCTCAGCCCAACAATACAAGA |
|                                | reverse | GTGGACGGGTCGATGTCAC     |
| <b>PLXND1</b>                  | forward | TCGCTGCCAATCCCTAATAAGA  |
|                                | reverse | TGACCTGGTTTGGAAGTGTG    |
| <b>SELE</b>                    | forward | ATGCCTCGCGCTTTCTCTC     |
|                                | reverse | GTAGTCCCGCTGACAGTATGC   |
| <b>TLR4</b>                    | forward | CCATGCATTTGGCCTTAGCC    |
|                                | reverse | AGAGCACTGAACCTCCTTGC    |
| <b>TNF-<math>\alpha</math></b> | forward | CCCTCCTGGCCAACGGCATG    |
|                                | reverse | TCGGGGCAGCCTTGTCCCTT    |
| <b>VCAM</b>                    | forward | TAGAGTGCAAGGAGTTCGGG    |
|                                | reverse | CCGGCATATACGAGTGTGAA    |

\*acidic ribosomal phosphoprotein P0 (RPLP0). All primers are 5'→3'
